# Supplementary material for: Meta-Analyse zur Wirksamkeit deutscher suchtpräventiver Lebenskompetenzprogramme
Source: Atypon-hosted journal article supplement (doi:10.1026/0942-5403/a000202), 2016-05-31
Supplement: 0942-5403_a000202_esm1.pdf [file 0942-5403_a000202_esm1.pdf]

Online zur Verfügung gestellte Materialien

Online Anhang A: Suchbegriffe der Literatursuche (in Deutsch)

| Zielgruppe       | Substanz/<br>Verhalten     | Zielverhalten | Intervention | Evaluation |
|------------------|----------------------------|---------------|--------------|------------|
| Kind*            | Substanz*                  | verwenden     | interven*    | evaluat*   |
| Adoleszenz       | Rauch*                     | Missbrauch    | bildung*     | erfolg*    |
| Pubertät         | Tabak                      | *beginn       | förder*      | wirksam*   |
| Teenager*        | Nikotin                    | Eintritt      | Promotion    | effektiv*  |
| Jugend*          | Alkohol                    | Reduktion*    | werb*        | effizient* |
| Jugendlich*      | Droge*                     | Prävention*   | Kampagne     | messen*    |
| frühes           | Marihuana                  | erhöhen       | Schule       | *prüfen    |
| Erwachsenenalter | Cannabis                   | verringern    | Peer         | vergleich* |
| junge Erwachsene | Illegal*                   | änder*        | Lehrplan     | Studie*    |
|                  | Ecstasy                    | aufhören      | Curriculum   | RCT        |
|                  | Amphetamin                 | enthalten     | Programm     |            |
|                  | Psychoaktiv*               | absetzen      | *prävention  |            |
|                  | Glücksspiel                | Rausch*       | primäre      |            |
|                  | Spiel*                     | berauscht     | Prävention   |            |
|                  | Videospiel                 | betäubt       | sekundäre    |            |
|                  | Internet                   | betrunken     | Prävention   |            |
|                  | Computer*                  | Aufnahme      | universelle  |            |
|                  | Opiate                     | Einnahme      | Prävention   |            |
|                  | Benzodiazepine             | *abhängig     | selektive    |            |
|                  | Schlafmittel               | *süchtig      | Prävention   |            |
|                  | verschreibungspflichtige   | Sucht*        | Gesundheits- |            |
|                  | Medikamente                | Problem*      | förderung    |            |
|                  | verschreibungspflichtige   | pathologisch  |              |            |
|                  | Arzneimittel               |               |              |            |
|                  | verschreibungspflichtige   |               |              |            |
|                  | Drogen                     |               |              |            |
|                  | Neuro-Enhancement          |               |              |            |
|                  | leistungssteigernde Drogen |               |              |            |
|                  | Drogen und Arzneimittel    |               |              |            |
|                  | verschreibungsfreie        |               |              |            |
|                  | Medikamente                |               |              |            |
