# Supplementary material for: Meta-Analyse zur Wirksamkeit deutscher suchtpräventiver Lebenskompetenzprogramme
Source: Atypon-hosted journal article supplement (doi:10.1026/0942-5403/a000202), 2016-05-31
Supplement: 0942-5403_a000202_esm2.pdf [file 0942-5403_a000202_esm2.pdf]

**Online Anhang B: Analyisierte suchtpräventive Lebenskompetenzprogramme (nach Bühler & Heppekausen, 2005, erweitert)**

|   | Programm/Manual                                     | Klassenstufe | Umfang/Struktur                                                                                                            | Kompetenzen |                   |                   |                  |                      |                |                   |                    |               |                     |       |             |        |
|---|-----------------------------------------------------|--------------|----------------------------------------------------------------------------------------------------------------------------|-------------|-------------------|-------------------|------------------|----------------------|----------------|-------------------|--------------------|---------------|---------------------|-------|-------------|--------|
|   |                                                     |              |                                                                                                                            | allgemeine  |                   |                   |                  |                      |                |                   |                    |               |                     |       | spezifische |        |
|   |                                                     |              |                                                                                                                            | Empathie    | Selbstwahrnehmung | Kritisches Denken | Kreatives Denken | Problemlösefähigkeit | Entscheidungen | Stressbewältigung | Gefühlsbewältigung | Kommunikation | Beziehungsfähigkeit | Tabak | Alkohol     | Drogen |
| 1 | Klasse2000                                          | 1-4          | 12 Unterrichtseinheiten pro Klasse 1-4; Curriculum                                                                         | ●           | ●                 | ●                 | ●                | ●                    | ●              | ●                 | ●                  | ●             | ●                   | ●     | ●           | ●      |
| 2 | Fit und stark fürs Leben                            | 1-2          | 20 Unterrichtseinheiten pro Klassen 1-2, 3-4 und 5-6; (unabhängig voneinander einsetzbar), Curriculum                      | ●           | ●                 | ●                 | ●                | ●                    |                | ●                 | ●                  | ●             | ●                   | ●     |             |        |
| 3 |                                                     | 3-4          |                                                                                                                            |             |                   |                   |                  |                      |                |                   |                    |               |                     |       |             |        |
|   |                                                     | 5-6          |                                                                                                                            |             |                   |                   |                  |                      |                |                   |                    |               |                     |       |             |        |
|   | Eigenständig werden                                 | 1-4          | 42 Unterrichtseinheiten pro Schuljahr, Baukasten                                                                           | ●           | ●                 | ●                 | ●                | ●                    |                | ●                 | ●                  | ●             | ●                   | ●     |             |        |
| 4 |                                                     | 5-6          | 16 Unterrichtseinheiten in Klasse 5 und 6; Curriculum                                                                      | ●           | ●                 | ●                 |                  | ●                    | ●              | ●                 | ●                  | ●             | ●                   | ●     | ●           |        |
| 5 | ALF – Allgemeine Lebenskompetenzen und Fertigkeiten | 5-6          | 12 Unterrichtseinheiten in Klassenstufe 5 und 8 Unterrichtseinheiten in Klasse 6; Curriculum                               | ●           | ●                 | ●                 | ●                | ●                    | ●              | ●                 | ●                  | ●             | ●                   | ●     | ●           |        |
| 6 | Erwachsen werden                                    | 5-10         | 73 Unterrichtsthemen (1h pro Woche); Baukasten                                                                             | ●           | ●                 | ●                 | ●                | ●                    | ●              | ●                 | ●                  | ●             | ●                   | ●     | ●           | ●      |
| 7 | IPSY – Information und psychosoziale Kompetenz      | 5-7          | 15 Unterrichtseinheiten in Klasse 5, 7 Unterrichtseinheiten in Klasse 6 und 7 Unterrichtseinheiten in Klasse 7, Curriculum | ●           | ●                 | ●                 | ●                | ●                    | ●              | ●                 | ●                  | ●             | ●                   | ●     | ●           |        |
| 8 | Stark im Leben                                      | 7-8          | 9 Unterrichtseinheiten in Klasse 7, 3 Unterrichtseinheiten in Klasse 8, Curriculum                                         | ●           | ●                 | ●                 |                  |                      | ●              |                   | ●                  | ●             | ●                   | ●     |             |        |
